# Supplementary material for: Vascular Endothelial Growth Factor and Its Soluble Receptor in Systemic Lupus Erythematosus Patients
Source: MDPI journal article supplement (doi:10.3390/biom12121884), 2022-12-15
Supplement: s1 [file s1]

**Supplementary Table S1. Relation of SLICC score items to VEGF axis.**

| Supplementary Table 5A: Relation of SLEES score items to VEGF axis. |    |    |                        |              |                  |                  |              |
|---------------------------------------------------------------------|----|----|------------------------|--------------|------------------|------------------|--------------|
|                                                                     | n  | %  | log VEGF x 100, pg/ml  | p            | sVEGFR, pg/ml    | ratio VEGF/sVEGF |              |
|                                                                     |    |    | beta coef. (95%)       |              | beta coef. (95%) | p                | p            |
| Ocular                                                              |    |    |                        |              |                  |                  |              |
| Any cataract ever                                                   | 29 | 11 | -9 (-47-30)            | 0.66         | -25 (-70-19)     | 0.27             | 0.11         |
| Retinal change or optic atrophy                                     | 33 | 12 | <b>-46 (-81- -10)</b>  | <b>0.011</b> | -28 (-69-14)     | 0.19             | 0.37         |
| Points =>1 in the domain                                            | 63 | 22 | -16 (-43-11)           | 0.26         | -10 (-42-22)     | 0.56             | 0.95         |
| Neuropsychiatric                                                    |    |    |                        |              |                  |                  |              |
| Cognitive impairment                                                | 7  | 3  | 42 (-28-113)           | 0.24         | 74 (-11-159)     | 0.088            | 0.73         |
| Seizures requiring therapy for 6 months                             | 15 | 5  | 22 (-27-71)            | 0.38         | 19 (-40-78)      | 0.53             | 0.85         |
| Cerebrovascular accident ever                                       | 13 | 5  | 8 (-46-63)             | 0.76         | -48 (-160-64)    | 0.40             | 0.95         |
| Cranial or peripheral neuropathy                                    | 5  | 2  | -3 (-96-90)            | 0.95         | -48 (-160-64)    | 0.40             | 0.75         |
| Transverse myelitis                                                 | 1  | 0  | <b>-191 (-375- -7)</b> | <b>0.042</b> | -126 (-349-97)   | 0.27             | 0.90         |
| Points =>1 in the domain                                            | 40 | 14 | 17 (-15-49)            | 0.30         | 22 (-17-60)      | 0.27             | 0.78         |
| Renal                                                               |    |    |                        |              |                  |                  |              |
| Estimated or measured glomerular filtration rate <50%               | 13 | 5  | -15 (-70-40)           | 0.59         | -9 (-74-57)      | 0.80             | 0.36         |
| Proteinuria 3.5 gm/24 hours                                         | 7  | 3  | 70 (-0,1-141)          | 0.050        | 48 (-37-133)     | 0.26             | 0.80         |
| End-stage renal disease                                             | 4  | 1  | 25 (-6-56)             | 0.11         | -13 (-51-24)     | 0.49             | 0.15         |
| Points =>1 in the domain                                            | 28 | 10 | 18 (-19-56)            | 0.34         | 17 (-28-62)      | 0.45             | 0.63         |
| Pulmonary                                                           |    |    |                        |              |                  |                  |              |
| Pulmonary hypertension                                              | 4  | 1  | -35 (-128-58)          | 0.46         | -0.5 (-113-112)  | 0.99             | 0.59         |
| Pulmonary fibrosis                                                  | 4  | 1  | 33 (-61-126)           | 0.49         | -19 (-132-93)    | 0.74             | 0.95         |
| Shrinking lung                                                      | 2  | 1  | -27 (-158-105)         | 0.69         | -58 (-217-100)   | 0.47             | 0.54         |
| Pleural fibrosis                                                    | 1  | 0  | 7 (-178-193)           | 0.95         | -89 (-313-135)   | 0.43             | 0.80         |
| Pulmonary infarction                                                | 1  | 0  | -45 (-231-141)         | 0.64         | -42 (-266-183)   | 0.71             | 0.62         |
| Points =>1 in the domain                                            | 19 | 7  | -12 (-56-32)           | 0.58         | -24 (-83-35)     | 0.43             | 0.67         |
| Cardiovascular                                                      |    |    |                        |              |                  |                  |              |
| Angina or coronary artery bypass                                    | 4  | 1  | 16 (-77-109)           | 0.74         | 76 (-36-189)     | 0.18             | 0.42         |
| Myocardial infarction ever                                          | 2  | 1  | -4 (-135-128)          | 0.96         | 56 (-103-215)    | 0.49             | 0.50         |
| Cardiomyopathy                                                      | 2  | 1  | -80 (-211-51)          | 0.23         | -61 (-220-97)    | 0.45             | 0.82         |
| Valvular disease                                                    | 9  | 3  | 18 (-48-85)            | 0.59         | -32 (-107-44)    | 0.41             | 0.31         |
| Pericarditis for 6 months, or pericardiectomy                       | 2  | 1  | 87 (-44-218)           | 0.19         | -2 (-162-157)    | 0.98             | 0.70         |
| Points =>1 in the domain                                            | 23 | 8  | 11 (-30-52)            | 0.60         | -10 (-58-39)     | 0.70             | 0.77         |
| Peripheral vascular                                                 |    |    |                        |              |                  |                  |              |
| Claudication for 6 months                                           | 3  | 1  | 26 (-82-134)           | 0.64         | 66 (-64-195)     | 0.32             | 0.41         |
| Minor tissue loss (pulp space)                                      | 5  | 2  | 33 (-50-117)           | 0.43         | -45 (-146-56)    | 0.38             | <b>0.016</b> |

|                                                                                           |    |    |                   |              |                     |              |      |
|-------------------------------------------------------------------------------------------|----|----|-------------------|--------------|---------------------|--------------|------|
| Significant tissue loss ever                                                              | 0  | 0  | -                 | -            | -                   | -            | -    |
| Venous thrombosis                                                                         | 14 | 5  | -23 (-76-30)      | 0.39         | -21 (-83-40)        | 0.49         | 0.17 |
| <i>Points =&gt;1 in the domain</i>                                                        | 34 | 12 | 11 (-24-45)       | 0.54         | 4 (-37-45)          | 0.84         | 0.68 |
| <b>Gastrointestinal</b>                                                                   |    |    |                   |              |                     |              |      |
| Infarction or resection of terminal duodenum, spleen, liver or gallbladder for any reason | 22 | 8  | 22 (-19-63)       | 0.29         | <b>53 (2-103)</b>   | <b>0.040</b> | 0.46 |
| Mesenteric insufficiency                                                                  | 1  | 0  | -49 (-234-136)    | 0.60         | -87 (-310-137)      | 0.45         | 0.82 |
| Chronic peritonitis                                                                       | 1  | 0  | 138(-47-322)      | 0.14         | 102 (-121-325)      | 0.37         | 0.94 |
| Stricture or upper gastrointestinal tract surgery ever                                    | 0  | 0  | -                 | -            | -                   | -            | -    |
| Pancreatic insufficiency                                                                  | 0  | 0  | -                 | -            | -                   | -            | -    |
| <i>Points =&gt;1 in the domain</i>                                                        | 28 | 10 | 21 (-16-57)       | 0.27         | 44 (-0.8-89)        | 0.054        | 0.52 |
| <b>Musculoskeletal</b>                                                                    |    |    |                   |              |                     |              |      |
| Muscle atrophy or weakness                                                                | 3  | 1  | 46 (-63-154)      | 0.41         | 47 (-85-178)        | 0.49         | 0.74 |
| Deforming or erosive arthritis                                                            | 40 | 15 | <b>41 (9-73)</b>  | <b>0.013</b> | <b>40 (1-79)</b>    | <b>0.042</b> | 0.69 |
| Osteoporosis with fracture or vertebral collapse                                          | 23 | 9  | 25 (-16-67)       | 0.23         | <b>57 (8-106)</b>   | <b>0.023</b> | 0.46 |
| Avascular necrosis                                                                        | 7  | 3  | 29 (-43-101)      | 0.42         | -69 (-155-17)       | 0.12         | 0.11 |
| Osteomyelitis                                                                             | 1  | 0  | 29 (-158-216)     | 0.76         | <b>309 (86-533)</b> | <b>0.007</b> | 0.50 |
| Tendon rupture                                                                            | 4  | 2  | 27 (-67-121)      | 0.57         | 74 (-40-187)        | 0.20         | 0.73 |
| <i>Points =&gt;1 in the domain</i>                                                        | 89 | 31 | <b>37 (14-61)</b> | <b>0.002</b> | <b>43 (14-71)</b>   | <b>0.003</b> | 0.78 |
| <b>Skin</b>                                                                               |    |    |                   |              |                     |              |      |
| Scarring chronic alopecia                                                                 | 16 | 6  | -5 (-53-42)       | 0.82         | -33 (-91-25)        | 0.27         | 0.43 |
| Extensive scarring or panniculitis                                                        | 10 | 4  | 3 (-57-63)        | 0.92         | 26 (-46-99)         | 0.48         | 0.50 |
| Skin ulceration                                                                           | 4  | 1  | -11 (-118-97)     | 0.85         | -75 (-188-38)       | 0.19         | 0.86 |
| <i>Points =&gt;1 in the domain</i>                                                        | 39 | 14 | 3 (-9-15)         | 0.21         | -8 (-47-30)         | 0.67         | 0.34 |
| Premature gonadal failure                                                                 | 19 | 7  | 20 (-25-65)       | 0.38         | 18 (-35-71)         | 0.50         | 0.65 |
| Diabetes (regardless of treatment)                                                        | 18 | 6  | 22 (-23-67)       | 0.33         | 36 (-18-90)         | 0.19         | 0.80 |
| Malignancy (exclude dysplasia)                                                            | 11 | 4  | -42 (-98-15)      | 0.15         | <b>79 (11-146)</b>  | <b>0.023</b> | 0.39 |

SLICC items and domains represent the independent variable. Significant p values are depicted in bold.

SLICC: Systemic Lupus International Collaborating Clinics/American College of Rheumatology Damage Index.
